# Supplementary material
Source: HighWire-hosted journal article supplement (doi:10.1101/rna.078905.121)
Supplement: Supplemental_Fig_Legends_Tables_.docx [file Supplemental_Fig_Legends_Tables_.docx]

**Effects of transgene insertion loci and copy number on *Dnmt3L* gene silencing through antisense transgene-derived PIWI-interacting RNAs**

SePil Lee1, Satomi Kuramochi-Miyagawa1,2 *, Ippei Nagamori2, and Toru Nakano1,2*

**Supplementary figure legends**

**Fig S1. Transgene insertion sites on chromosome 18 (ch18) in the mouse genome**

(A) Schematic illustration of the transgene-inserted locus in Ch18qE1 and location of the primers used in this study. The primers were designed outside the overlapped regions of the head and tail. Black arrows indicate the positions of the primers. The sequences of the primers are shown in Table S4. (B) Polymerase chain reaction products were subjected to agarose gel electrophoresis with Tris-acetate EDTA buffer. The expected band sizes were confirmed. (C) Characterization of the Ch18qB3 (chr18:61,621,501-61,671,500 on mm10) and E1 (chr18:41,267,301-41,317,300 on mm10) loci around the insertion sites. Each schematized locus covers 50 kb from the left to the right ends. Each track of the E16.5 piRNA profiles displays MILI- and MIWI2-associated piRNA data from wild-type (WT) or MILIDAH mice (De Fazio et al., 2011) which were referenced using the piRbase. Predicted genes in the sequences (using UCSC) are shown below the piRNAs. The repeated sequences, as defined by RepeatMasker, are shown at the bottom. The number of items within each group present in each 50 kb range and their coverage are shown on the right. (D) Number of small RNAs derived from the genomic region around the transgene insertion site in the WT testis at E16.5. The number of small RNAs mapped in the 50 kb regions represented in Figure S1C is shown at the top of the table and classified according to their orientation into sense and antisense strands. Besides, the numbers of small RNAs mapped against the 2.3-kb genomic region before and after the 18qB3 transgene insertion site (B3-3' and B3-5'), against the duplicated 2.3-kb genomic region (E1) on either side of the 18qE1 transgene, and those mapped to the *Miwi2* promoter (2.5 kb) (negative control) are also shown in the table. The number of piRNAs was normalized based on a 1000 bp length; the total small RNA number per million (excluding miRNAs and tRNAs) is shown in parentheses. The left panel of the table was extracted from the WT data of our previous study, while the right panel of the table was obtained from Non-Tg mice in this study. Schematic diagrams of the 2.3 kb regions (mentioned above) in the E1 and B3 loci are shown below the table.

**Fig S2. Correlation between as*Dnmt3L* transgene copy number and phenotypes**

(A) Intermediate phenotypes observed when analyzing mice testes histologically by using hematoxylin and eosin (HE) staining. BR-1, BE 30, BE 3-1, and BE 2-2 are testes sections from the mice reported in Fig. 4B–C. (B) Higher magnification of the insert in BE2-2 of (A). The blue and red stars represent the cells in the seminiferous tubules that have undergone meiosis and those arrested at meiosis during spermatogenesis, respectively. (C) Phenotypes of mice with single or double transgene alleles inserted at the E locus (Tg-E mice). Transgene copy number, the percentage of the cells that have completed meiosis in HE-stained sections, and testis weight relative to the body weight are listed. (D) Correlation of *Dnmt3L* copy numbers and testicular weight. Black, yellow, orange, blue, and green dots indicate non-Tg, Tg-E mice with single transgene allele, Tg-E mice with double transgene alleles (Tg-E/E), Tg-B mice, and Tg-BE mice, respectively. The fitting curves were adjusted to a sigmoidal model (Min = 24.27, Max = 98.39, half-maximal effective concentration (EC50) = 18.64, p = 0.95).

**Fig S3. Chromosome spread analysis and immunochemical staining of MIWI2 of fetal testis in Tg-B mice**

(A) Chromosome spread analysis of the Tg-B mice. Representative chromosome spreads of spermatocytes from 7-week-old testes of the non Tg and Tg-B mice stained with anti-SCP1 (green) and anti-SCP3 (red) antibodies. Scale bar, 10 μm. (B) Ratio of cells in meiosis of the non-Tg and Tg-B mice in 7W testis. Lep: Leptotene, Zygo: Zygotene, Pac: Pachytene, Met: Metaphase I. (C) Immunohistochemical staining of MILI and MIWI2 of the testes of the non-Tg and Tg-B mice at E16.5. DNA was stained with DAPI (blue). Scale bar, 10 μm.

**Fig S4. Small RNAs in fetal testes of Tg-*Miwi2P-*as*Dnmt3L* mice**

(A) Outline of the analysis method. (B) Nucleotide distribution of the first and tenth nucleotides of piRNAs in transgene-annotated sense (upper row) and antisense (lower row) strands. (C) Size distribution of small RNAs in the sense and antisense strands reported in our previous study. The upper side represents the transgene sense strand where blue and purple bars indicate small RNAs with and without uracil as the first nucleotide, respectively. The lower side represents the transgene antisense strand where orange and purple bars indicate small RNAs with and without adenine as the tenth nucleotide, respectively. (D) Ratio of transgene-annotated piRNAs obtained from our previous study. Light blue, blue, and gray indicate the sense strand small RNAs annotated to *Miwi2* promoter, as*Dnmt3L*, and others, respectively. Yellow, orange, and brown indicate the antisense strand piRNAs annotated to *Miwi2* promoter, as*Dnmt3L*, and others, respectively. (E) Size distribution of transgene-annotated sense strand piRNAs in the fetal testes of Tg mice. The orange and purple bars indicate piRNAs with and without adenine as the tenth nucleotide, respectively. (F) Mapping of piRNAs of each mouse onto the transgene cassette sequence. The upper and the lower sides represent the sense strand in blue and the antisense strand in orange, respectively.

**Supplementary Tables**

**Table S1. piRNA cluster analysis using piRNAQuest***1**.**

|  | B3 locus | E1 locus |
| --- | --- | --- |
| Tg insertion sites in chr18 (Duplicated sites) | 41273987- 41311357 | 61646220-61648541 |
| Cluster ID | 18.503 | 18.786 |
| Cluster Loci | chr18:41263454 - 41322437 | chr18:61465420 -61662242 |
| Cluster Length | 58983 | 196822 |
| Total piRNA Count | 171 | 2178 |
| Cluster Score | 1.16 e-6 | 4.43 e-6 |
| piRNA count in (+)ve strand | 102 | 1119 |
| piRNA count in (-)ve strand | 69 | 1059 |

*1,http://bicresources.jcbose.ac.in/zhumur/pirnaquest/index.html

**Table S2. Small RNAs in fetal testes of Tg*-Miwi2P-*as*Dnmt3L* mice.**

|  |  | WT | TgE | TgB | TgBE |
| --- | --- | --- | --- | --- | --- |
| total reads | | 37,617,623 | 34,070,151 | 42,122,809 | 38,088,764 |
| total count (15-45nt) | | 31,026,523 | 32,655,521 | 34,959,495 | 31,077,503 |
| miRBase annotated | | 24,875,480 | 28,615,678 | 28,700,182 | 25,894,017 |
| tRNAlist annotated | | 918,995 | 581,121 | 888,450 | 521,456 |
| (miRNA tRNA unannotated) | | **5,232,048** | **3,458,722** | **5,370,863** | **4,662,030** |
| Tg-as3L annotated | | 37 | 3,084 | 23,639 | 25,490 |
|  | transgene sense | 15 | 2,138 | 15,175 | 16,126 |
|  | transgene antisense | 22 | 946 | 8,464 | 9,364 |

**Table S3. Comparison between our previous and current studies.**

|  | transgene insertion sites | transgene copy number | DNMT3L  Silencing (Western  blot) | Meiotic  arrest | Decreased methylation of DNMT3L  Targets | piRNAs from  transgene sense strand | | Dnmt3L Promoter  methylation | Silencing by | |
| --- | --- | --- | --- | --- | --- | --- | --- | --- | --- | --- |
| amout of piRNAs | Peak length(nt) | PTGS | TGS |
| Previous data | Ch18 B1 & E3 & other loci ?  (piRNA cluster)  *1 | **high** | **〇** | **〇** | **〇** | **many** | **28/27**  *2 | **△** | **〇** | **〇** |
| Current data | Ch18 B1 & E3 | **high** | **〇** | **〇** | **〇** | **many** | **27** | **X** | **〇** | **X** |
| Ch18 B1 | **high** | **〇** | **〇** | **〇** | **many** | **27** | **X** | **〇** | **X** |
| Ch18 E3 | **low** | **X** | **X** | **△** | **less** | **27** | **X** | **△** | **X** |

For each category, "〇," "△," and "X" indicate fully, partially, and hardly phenotyped.

*1: Transgene insertion sites in the previous data are thought to be Ch18B3 and E1 plus unknown loci; such unknown loci may be strong piRNA clusters.

*2: The highest peak was observed at 28 nt. Additionally, the peak of the piRNA with uracil as the first nucleotide was at 27 nt.

**Table S4. Primers used for examining the integration sites in Ch18qE1.**

| primers | Sequence |
| --- | --- |
| outside of E1 overlapped **head-F** | GTTGCTATCATCAGCAAGTCTGCCGTC |
| outside of overlapped **head-R**  (Miwi2P head junction R) | CAAGAGATGTGGAATCTGGAATAGCACC |
| outside of overlapped **tail-F**  (asDnmt3L tail junction F) | GTCTTAGAGCAAGAAGAAGGTGTCTC |
| outside of E1 overlapped **tail-R** | TATCCATTTGTTGCTAACCTCCCAAGC |

**Table S5. Genotyping primers for B3 and E1 detection.**

| Genotyping primer | | | Sequence |
| --- | --- | --- | --- |
| Tg internal | | *Miwi2P* tail junction F | CACAGCCACACCGTCTCTTTTGCC |
| *asDnmt3L* head junction R | AAGTCTTTCCTAGAACCAGGGCAG |
| B3 locus | Head | B3 locus head junction F | CAAGAGTTCTTTTCTCATTTTAATTGG |
| *Miwi2P* head junction R | CAAGAGATGTGGAATCTGGAATAGCACC |
| Tail | *asDnmt3L* tail junction F | GAGTGTACACCTGGAGAGTTCCACAGC |
| B3 locus tail junction R | CCTGTGATATGTCCCATCCCGAGGCATC |
| E1 locus | Head | E1 locus head junction F | TGGGTCAGGAGCCAGCATGAAGGCAGCG |
| *Miwi2P* head junction R | CAAGAGATGTGGAATCTGGAATAGCACC |
| Tail | *asDnmt3L* tail junction F | GTCTTAGAGCAAGAAGAAGGTGTCTC |
| E1 locus tail junction R | ACTATCCTAAACTGTCCCTA GTCCATT |

**Table S6. Primers used for transgene copy number analysis using qPCR.**

| E1 Tg integration confirm | Sequence |
| --- | --- |
| *Dnmt3l*-qPCR F | GAAAAACTTCACAACAGGTACACACAG |
| *Dnmt3l*-qPCR R | AAGTCTTTCCTAGAACCAGGGCAG |
| *mTERT* qPCR F | TTTGTAAGGTAAGACCCTCTTCTGG |
| *mTERT qPCR* R | CTATCAGCAATAGCTCTGGTTCTCT |

**Table S7. Bisulfite sequencing primers.**

| Bisulfite sequencing primer | sequence |
| --- | --- |
| *LINE1 Tf* F | GTTAGAGAATTTGATAGTTTTTGGAATAGG |
| *LINE1* *Tf* R | CCAAAACAAAACCTTTCTCAAACACTATAT |
| *LINE1* A F | TTATTTTGATAGTAGAGTT |
| *LINE1* A R | CAAACCAAACTCCTAACAAAAATTATA |
| *IAP 1d1* 1st F | TTGTGTTTTAAGTGGTAAATAAATAATT |
| *IAP 1d1* 1st R | ATTCTAAAATAAAATATCCCTCC |
| *IAP 1d1* 2nd F | TTGTGTTTTAAGTGGTAAATAAATAATT |
| *IAP 1d1* 2nd R | CAAAAAAAACACCACAAACCAAAAT |
| *Rasgrf1*1st F | GAGAGTATGTAAAGTTAGAGTTGTGTTG |
| *Rasgrf1* 2nd F | TAAAGATAGTTTAGATATGGAATTTTGGG |
| *Rasgrf1* R | ATAATACAACAACAATAACAATC |
| *H19* 1st F | GAGTATTTAGGAGGTATAAGAATT |
| *H19* 1st R | ATCAAAAACTAACATAAACCCCT |
| *H19* 2nd F | GTAAGGAGATTATGTTTATTTTTGG |
| *H19* 2nd R | CCTCATTAATCCCATAACTAT |
| *Dlk1* 1st F | GAGTTAAGGTATATTATGTTAGTGTTAGG |
| *Dlk1* 2nd F | ATATTATGTTAGTGTTAGGAAGGATTGTG |
| *Dlk1* R | TACAACCCTTCCCTCATCCAAAAATT |
| *Snrpn* 1st F | TATGTAATATGATATAGTTTAGAAATTAG |
| *Snrpn* 1st R | AATAAACCCAAATCTAAAATATTTTAATC |
| *Snrpn* 2nd F | AATTTGTGTGATGTTTGTAATTATTTGG |
| *Snrpn* 2nd R | ATAAAATACACTTTCACTACTAAAATCC |
| *Dnmt3L* promoter 1st F | ATTTTAATGTGTGAGGTTTAGAGTTTTT |
| *Dnmt3L* promoter 1st R | ACCTAAAAATCTCACAAAATTTCAAC |
| *Dnmt3L* promoter 2nd F | GTTTTGAGTTTTATAGAATTTTATAATTTTT |
| *Dnmt3L* promoter 2nd R | AAAAACTATCAACATCAAAACTAAAAC |
